# Supplementary material
Source: Royal Society of Chemistry journal article supplement (doi:10.1039/d6ta01119e)
Supplement: d6ta01119e1.pdf [file d6ta01119e1.pdf]

*Supporting Information for:*

**Synergistic Valorization of Spent Lithium-Ion Battery  
Electrodes: Anode Graphite Derived Lamellar Graphene Oxide  
Membranes for Selective Lithium Recovery from Cathode  
Leachate**

Ying Zheng<sup>a,b§</sup>, Ziwen Dai<sup>a,c§</sup>, Zhaoyang Li<sup>a,c</sup>, Guang Hu<sup>a,c</sup>, Sha Liang<sup>a,c</sup>, Wenbo Yu<sup>a,c</sup>,  
Shushan Yuan<sup>a,c\*\*</sup>, Huabo Duan<sup>a,c</sup>, Liang Huang<sup>a,c</sup>, Jingping Hu<sup>a,c</sup>, Huijie Hou<sup>a,c</sup>, Jiakuan  
Yang<sup>a,c,d\*</sup>

<sup>a</sup> Hubei Key Laboratory of Multi-media Pollution Cooperative Control in Yangtze Basin,  
School of Environmental Science & Engineering, Huazhong University of Science and  
Technology (HUST), 1037 Luoyu Road, Wuhan, Hubei, 430074, China

<sup>b</sup> School of Urban Construction, Wuchang Shouyi University, 22 Nanli Road, Wuhan,  
Hubei 430064, China

<sup>c</sup> Hubei Provincial Engineering Laboratory of Solid Waste Treatment, Disposal and  
Recycling, Huazhong University of Science and Technology (HUST), 1037 Luoyu Road,  
Wuhan, Hubei 430074, China

<sup>d</sup> State Key Laboratory of Coal Combustion, Huazhong University of Science and  
Technology (HUST), 1037 Luoyu Road, Wuhan, Hubei 430074, China

\*Corresponding Author:

Prof. Jiakuan Yang, E-mail: [jkyang@hust.edu.cn](mailto:jkyang@hust.edu.cn), Tel.: +86-27-87540995.

Prof. Shushan Yuan E-mail:[yuanss@hust.edu.cn](mailto:yuanss@hust.edu.cn), Tel.: +86-27-87792207.

## Contents of Supporting Information

|                                                                                                                                                                                                                                                                                                                                                         |    |
|---------------------------------------------------------------------------------------------------------------------------------------------------------------------------------------------------------------------------------------------------------------------------------------------------------------------------------------------------------|----|
| <b>Text S1.</b> Pretreatment of the spent graphite in the spent lithium-ion batteries (LIBs).....                                                                                                                                                                                                                                                       | 5  |
| <b>Text S2.</b> Membrane separation experiments. ....                                                                                                                                                                                                                                                                                                   | 6  |
| <b>Table S1.</b> Evolution of C-C bond length and lattice parameter during graphene oxide (GO) synthesis.....                                                                                                                                                                                                                                           | 8  |
| <b>Table S2.</b> Evolution of raman spectra during graphene oxide (GO) synthesis.....                                                                                                                                                                                                                                                                   | 9  |
| <b>Table S3.</b> Performance comparison of $\text{Li}^+$ flux <i>versus</i> $\text{Li}^+/\text{M}^{2+}$ selectivity for the representative membranes.....                                                                                                                                                                                               | 10 |
| <b>Table S4</b> Economic analysis of recycling of 1 kg spent graphite in the spent lithium-ion batteries (LIBs). ....                                                                                                                                                                                                                                   | 12 |
| <b>Figure S1.</b> Images of the graphene oxide (GO) membrane (deposition amount: $0.15\text{g}\cdot\text{m}^{-2}$ ). 14                                                                                                                                                                                                                                 |    |
| <b>Figure S2.</b> C 1s spectrum of (a) spent graphite, (c) graphite oxide, and (e) graphene oxide (GO) ; O 1s spectrum of (b) spent graphite, (d) graphite oxide, and (f) graphene oxide (GO).....                                                                                                                                                      | 15 |
| <b>Figure S3.</b> (a, b) AFM 3D image; (c, d) AFM surface image of graphene oxide (GO) nanosheet; (e, f) Size of graphene oxide (GO) nanosheet. ....                                                                                                                                                                                                    | 16 |
| <b>Figure S4.</b> SEM images of the polyethersulfone (PES).....                                                                                                                                                                                                                                                                                         | 17 |
| <b>Figure S5.</b> SEM images of the graphene oxide (GO) membrane (a, b, and c) and graphene oxide-polyethyleneimine (GO-PEI) membrane (d, e, and f) surface with the different graphene oxide (GO) deposition amounts: (a, d) $0.15\text{g}\cdot\text{m}^{-2}$ ; (b, e) $0.3\text{g}\cdot\text{m}^{-2}$ ; (c, f) $0.6\text{g}\cdot\text{m}^{-2}$ . .... | 18 |

|                                                                                                                                                                                                                                                                                                                                                    |    |
|----------------------------------------------------------------------------------------------------------------------------------------------------------------------------------------------------------------------------------------------------------------------------------------------------------------------------------------------------|----|
| <b>Figure S6.</b> EDS of the graphene oxide (GO) membrane (a, b, and c) and graphene oxide-polyethyleneimine (GO-PEI) membrane (d, e, and f) surface with the different graphene oxide (GO) deposition amounts: (a, d) $0.15\text{ g}\cdot\text{m}^{-2}$ ; (b, e) $0.3\text{ g}\cdot\text{m}^{-2}$ ; (c, f) $0.6\text{ g}\cdot\text{m}^{-2}$ ..... | 19 |
| <b>Figure S7.</b> (a) AFM surface image, and (b) surface roughness of graphene oxide (GO) (0.6) membrane.....                                                                                                                                                                                                                                      | 20 |
| <b>Figure S8.</b> The contact angles for graphene oxide (GO) membranes and graphene oxide-polyethyleneimine (GO-PEI) membranes with the different loadings: 0.15, 0.3, and $0.6\text{ g}\cdot\text{m}^{-2}$ .....                                                                                                                                  | 21 |
| <b>Figure S9.</b> The potentials of (a) graphene oxide (GO) membrane, (b) GO (0.15)-polyethyleneimine (PEI) membrane, (c) GO (0.3)-PEI membrane, and (d) GO (0.6)-PEI membrane.....                                                                                                                                                                | 22 |
| <b>Figure S10.</b> Activation energy for ion permeation through the GO(0.6)-PEI membrane. ....                                                                                                                                                                                                                                                     | 23 |
| <b>Figure S11.</b> (a) XRD pattern, and (b) SEM image of the recovered $\text{Li}_2\text{CO}_3$ product. ....                                                                                                                                                                                                                                      | 24 |
| <b>References</b> .....                                                                                                                                                                                                                                                                                                                            | 25 |

### **Text S1. Pretreatment of the spent graphite in the spent lithium-ion batteries (LIBs).**

The collected spent lithium-ion batteries (LIBs) were immersed in a 5% NaCl solution for thorough discharge. After discharging, the batteries were disassembled to obtain the anode sheets. These anode sheets were cut into small segments using scissors. The segments were then immersed in N-methylpyrrolidone (NMP) solution at 50 °C for 1 h to separate the graphite from the copper foil current collector. The separated graphite was subsequently oven-dried and ground. The ground material was sieved through a 300-mesh sieve. The powders were placed in an alumina crucible and calcined in a tube furnace at 500 °C for 2 h to remove residual binder and carbon black, yielding the final experimental material: the spent graphite.

## Text S2. Membrane separation experiments.

The separation experiments primarily investigated the separation performance of  $\text{Li}^+$  versus other divalent ions in leachates from single salts, mixed salts, and spent LIB cathode materials. All separation experiments were conducted in a bilateral diffusion cell with an effective membrane diameter of 8 mm. First, the membrane was installed in the diffusion cell. The diffusion cell was wetted with a 50% (wt.) ethanol/water mixture on both sides for 5 min. The cell was then rinsed three times with deionized (DI) water. Subsequently, DI water was added to the permeate side facing the base membrane, while the selective side was filled with either a single-salt solution ( $\text{LiCl}$ ,  $\text{MgCl}_2$ ,  $\text{CoCl}_2$ ,  $\text{NiCl}_2$ , or  $\text{MnCl}_2$ ) or a binary-salt mixture ( $\text{LiCl/MgCl}_2$ ,  $\text{LiCl/CoCl}_2$ ,  $\text{LiCl/NiCl}_2$ , or  $\text{LiCl/MnCl}_2$ ) at a concentration of  $0.1 \text{ mol L}^{-1}$  or spent LIBs cathode leachate at a  $\text{Li}^+$  concentration of  $0.1 \text{ mol L}^{-1}$ ,  $\text{Ni}^{2+}$ ,  $\text{Co}^{2+}$ , and  $\text{Mn}^{2+}$  concentration of  $0.001 \text{ mol L}^{-1}$ . Separation was carried out at a constant trans-membrane pressure of 1 atm and a temperature of  $25 \text{ }^\circ\text{C}$  for 1 h. The solutions on both sides were stirred at 1500 rpm. Upon completion of each run, the salt concentrations in the permeate sides were determined by inductively coupled plasma optical emission spectroscopy (ICP-OES). The permeation flux  $J_s$  of individual ions was calculated by the following Equation S1.

$$J_s = \frac{CV \times 10^{-3}}{A \cdot t \cdot M} \quad (\text{S1})$$

Where,  $J_s$  is the permeation flux of the single-salt ion ( $\text{mol} \cdot \text{m}^{-2} \cdot \text{h}^{-1}$ );  $C$  is the salt concentration on the permeate side after  $t$  hours of separation ( $\text{mg} \cdot \text{L}^{-1}$ );  $V$  is the volume of the salt solution on the permeate side after  $t$  hours of separation (L);  $A$  is the effective

membrane area ( $\text{m}^2$ );  $M$  is the molar mass of the salt ( $\text{g}\cdot\text{mol}^{-1}$ ).

In the mixed-salt and spent LIBs cathode leachate separation experiments, the permeation flux of each ion was first calculated using the Equation S1 above, and the selectivity was subsequently determined according to Equation S2:

$$S = \frac{J_{S_1}}{J_{S_2}} \quad (\text{S2})$$

where  $S$  is the monovalent-to-divalent ion selectivity;  $J_{S_1}$  is the permeation flux of the monovalent ion ( $\text{mol}\cdot\text{m}^{-2}\cdot\text{h}^{-1}$ );  $J_{S_2}$  is the permeation flux of the divalent ion ( $\text{mol}\cdot\text{m}^{-2}\cdot\text{h}^{-1}$ ).

Furthermore, steady-state transmembrane permeation experiments were performed at 303 K, 313 K, 323 K and 333 K. Flux variations with temperature were recorded, and the activation energies ( $E_a$ ) for the transmembrane transport of various ions were determined by linear fitting with a modified Arrhenius equation (Equation S3).

$$\ln F = \ln A - \frac{E_a}{RT} \quad (\text{S3})$$

where  $F$  is the ion permeation flux ( $\text{mol}\cdot\text{m}^{-2}\cdot\text{h}^{-1}$ );  $E_a$  is the activation energy for transmembrane ion permeation ( $\text{kJ}\cdot\text{mol}^{-1}$ );  $R$  is the universal gas constant ( $8.314 \text{ J}\cdot\text{mol}^{-1}\cdot\text{K}^{-1}$ );  $T$  is the absolute temperature (K);  $A$  is the pre-exponential factor (a constant related to membrane structure and ionic characteristics).

**Table S1.** Evolution of C-C bond length and lattice parameter during graphene oxide (GO) synthesis.

| Samples           | Experimental<br>d <sub>110</sub> (Å) | d <sub>100</sub> (Å) |                       |                    | C-C<br>bond<br>length l<br>(Å) | Lattice<br>parameter<br>a<br>(Å) |
|-------------------|--------------------------------------|----------------------|-----------------------|--------------------|--------------------------------|----------------------------------|
|                   |                                      | Calculated<br>Value  | Experimental<br>Value | Deviation<br>Value |                                |                                  |
| Spent<br>graphite | 1.2323                               | 2.1344               | 2.1400                | 0.0056             | 1.4229                         | 2.4646                           |
| Graphite<br>oxide | 1.2410                               | 2.1495               | 2.1175                | -0.0320            | 1.4330                         | 2.4820                           |
| GO                | 1.2354                               | 2.1398               | 2.1160                | -0.0238            | 1.4265                         | 2.4708                           |

The (100) d-spacing, C-C bond length, and lattice parameter were calculated by

Equations S4-S6, respectively.

$$d_{100} = \sqrt{3} \times d_{110} = \frac{\sqrt{3}}{2} a \quad (\text{S4})$$

$$a = 2 \times d_{110} \quad (\text{S5})$$

$$l = \frac{a}{\sqrt{3}} \quad (\text{S6})$$

Where,  $d_{100}$  is the d-spacing of (100) (Å);  $d_{110}$  is the d-spacing of (110) (Å);  $l$  is the length of C-C bond (Å);  $a$  is the lattice parameter (Å).

**Table S2.** Evolution of raman spectra during graphene oxide (GO) synthesis.

| Samples             | D Band /cm <sup>-1</sup> |       | G Band /cm <sup>-1</sup> |       | Intensity ratio (I <sub>D</sub> /I <sub>G</sub> ) | Average Crystallite Size L <sub>a</sub> (nm) |
|---------------------|--------------------------|-------|--------------------------|-------|---------------------------------------------------|----------------------------------------------|
|                     | Raman shift              | FWHM  | Raman shift              | FWHM  |                                                   |                                              |
| Spent graphite      | 1402.4                   | 327.4 | 1576.6                   | 31.7  | 0.28                                              | 68.6                                         |
| Graphite oxide      | 1360.2                   | 200.9 | 1588.0                   | 97.9  | 1.93                                              | 10.0                                         |
| Graphene oxide (GO) | 1355.8                   | 203.9 | 1582.8                   | 105.7 | 2.00                                              | 9.6                                          |

The average crystallite size was calculated by [Equation S7](#).

$$L_a = (2.4 \times 10^{-10}) \lambda^4 \cdot (I_D / I_G)^{-1} \quad (S7)$$

Where, L<sub>a</sub> is the average crystallite size (nm); I<sub>D</sub>/I<sub>G</sub> is the ratio of intensity; λ is laser wavelength, 532 nm.

**Table S3.** Performance comparison of Li<sup>+</sup> flux *versus* Li<sup>+</sup>/M<sup>2+</sup> selectivity for the representative membranes.

| Membrane               | Li <sup>+</sup> permeation rate<br>(mol·m <sup>-2</sup> ·h <sup>-1</sup> ) | Li <sup>+</sup> /M <sup>2+</sup><br>Selectivity | References                          |
|------------------------|----------------------------------------------------------------------------|-------------------------------------------------|-------------------------------------|
| GO(0.6)-PEI            | 0.06977                                                                    | 52,856 (Li <sup>+</sup> /Mn <sup>2+</sup> )     | This work                           |
| TpBDMe2 COF            | 0.0383                                                                     | 35.8                                            | <a href="#">Sheng et al., 2021</a>  |
| COF-4EO-PAN            | 0.034                                                                      | 64                                              | <a href="#">Bing et al., 2025</a>   |
| M-2 membrane           | 0.015                                                                      | 13                                              | <a href="#">Wu et al., 2023</a>     |
| PET~0.6 nm pore        | 0.01                                                                       | ~100                                            | <a href="#">Wen et al., 2016</a>    |
| GO                     | 0.32                                                                       | 1.45                                            | <a href="#">Liang et al., 2020</a>  |
| Nafion                 | 0.0115                                                                     | 2.07                                            | <a href="#">Zhou et al., 2021</a>   |
| MXene                  | 0.00105                                                                    | 3.33                                            | <a href="#">Foller et al., 2021</a> |
| MXene                  | 0.014                                                                      | 2.6                                             | <a href="#">Kang et al., 2023</a>   |
| Porous graphene        | 0.0511                                                                     | 25.08                                           |                                     |
| Porous graphene        | 0.0961                                                                     | 12.99                                           |                                     |
| Porous graphene        | 0.0231                                                                     | 55.79                                           | <a href="#">Zhou et al., 2024</a>   |
| CMP-masked<br>graphene | 0.0103                                                                     | 232.3                                           |                                     |
| PA-g-TETA              | 0.00132                                                                    | 103.5                                           | <a href="#">Li et al., 2023</a>     |

---

|           |        |      |                    |
|-----------|--------|------|--------------------|
| PA-B2-E3  | 0.0677 | 12.7 | Li et al., 2017    |
| MXene/CNT | 0.0491 | 54.5 | Lu et al., 2019    |
| COF       | 0.0553 | 217  | Sheng et al., 2021 |
| DMBP-TB   | 0.06   | 14.6 | Tan et al., 2020   |

---

**Table S4** Economic analysis of recycling of 1 kg spent graphite in the spent lithium-ion batteries (LIBs).

|        | Item                              | Unit price                           | Quantity           | Cost (\$)        |
|--------|-----------------------------------|--------------------------------------|--------------------|------------------|
|        | Spent graphite                    | 0.46 \$/kg <sup>a</sup>              | 1.00 kg            | 0.46             |
|        | Concentrated sulfuric acid        | 0.0065 \$/ml <sup>b</sup>            | 60000 ml           |                  |
|        | Concentrated phosphoric acid      | 0.022 \$/ml <sup>b</sup>             | 5000 ml            | 834.79           |
|        | Potassium permanganate            | 0.032 \$/g <sup>b</sup>              | 10000 g            |                  |
| Input  | Hydrogen peroxide                 | 0.0079 \$/ml <sup>b</sup>            | 3000 ml            |                  |
|        | Industrial electricity            | 0.139 \$/kw·h <sup>c</sup>           | 221.37 kW·h        | 30.77            |
|        | Industrial water                  | 0.579 \$/m <sup>3</sup> <sup>d</sup> | 4.2 m <sup>3</sup> | 2.43             |
|        | Maintenance and Depreciation fees | 0.53 \$/kg <sup>e</sup>              |                    | 0.53             |
|        | Personnel wages                   | 0.30 \$/kg <sup>f</sup>              |                    | 0.30             |
|        | Hazardous waste disposal          |                                      |                    | 424 <sup>g</sup> |
| Output | Single-layer GO                   | 2.1 \$/g <sup>h</sup>                | 1000 g             | 2100             |
| Profit |                                   |                                      |                    | 806.72           |

a: The recycling cost for 1 kg of lithium cobalt oxide (LCO) batteries is approximately \$2,275.52 t<sup>-1</sup>. Given that waste graphite accounts for 20% of the mass, the cost attributable to it is \$0.46 kg<sup>-1</sup>.

b: The market price of concentrated sulfuric acid, concentrated phosphoric acid, potassium permanganate and hydrogen peroxide were provided by Sino pharm Chemical Reagent Co., Ltd. (<https://www.reagent.com.cn/>).

- c: The industrial electricity price in Wuhan, China is \$0.139 /kW·h.
- d: The industrial water price in Wuhan, China is \$0.579 /m<sup>3</sup>.
- e: The annual equipment maintenance and depreciation fees was calculated according to 3% of the cost of the equipment. The price of equipment (\$6384.888) was obtained from <https://prices.sci99.com>. The input cost of equipment was  $\$6384.888 \times 3\% \div 365 \approx \$0.53$ .
- f: The labor wage of processing 1t spent lithium ion battery in the literature was \$299.589.
- g: According to the actual situation of hazardous waste disposal in Hubei Province, China, the disposal cost of the wastes generated per 1 kilogram of GO produced was \$424.
- h: The values of GO was obtained from <https://prices.sci99.com>.

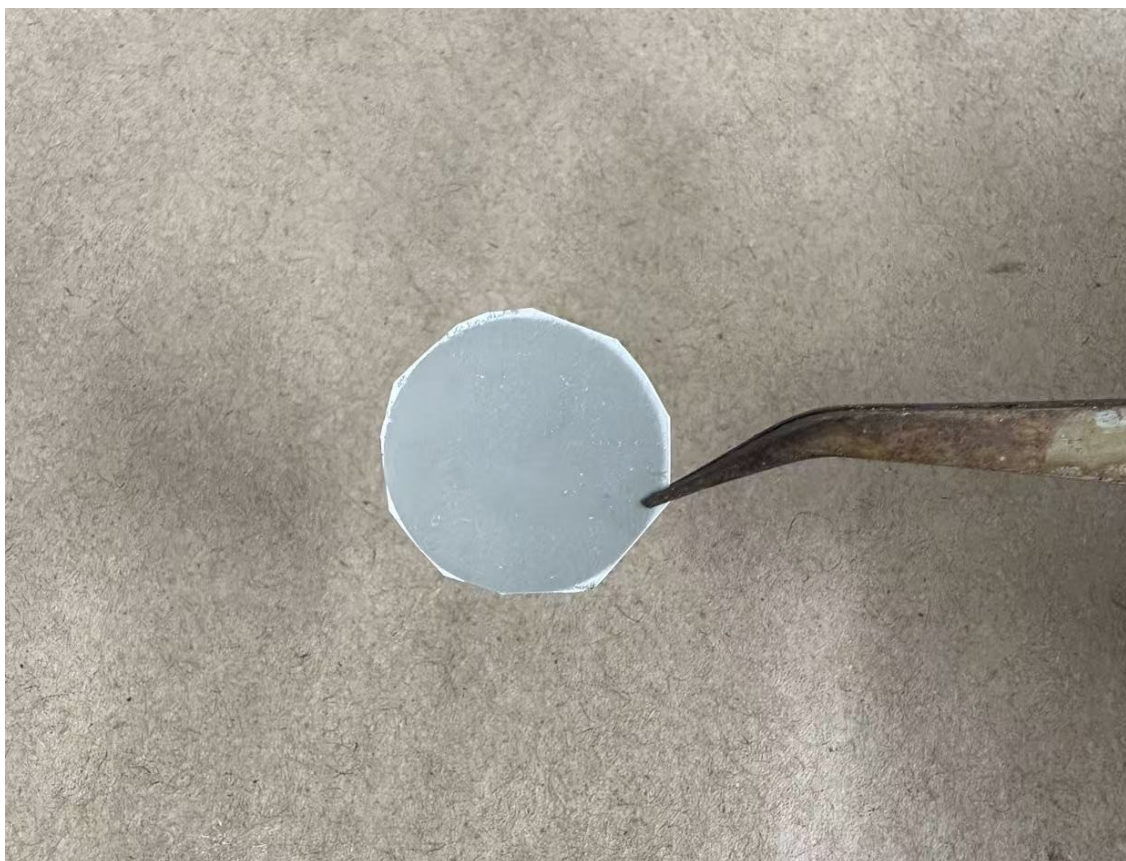

**Figure S1.** Images of the graphene oxide (GO) membrane (deposition amount:  $0.15\text{g}\cdot\text{m}^{-2}$ )

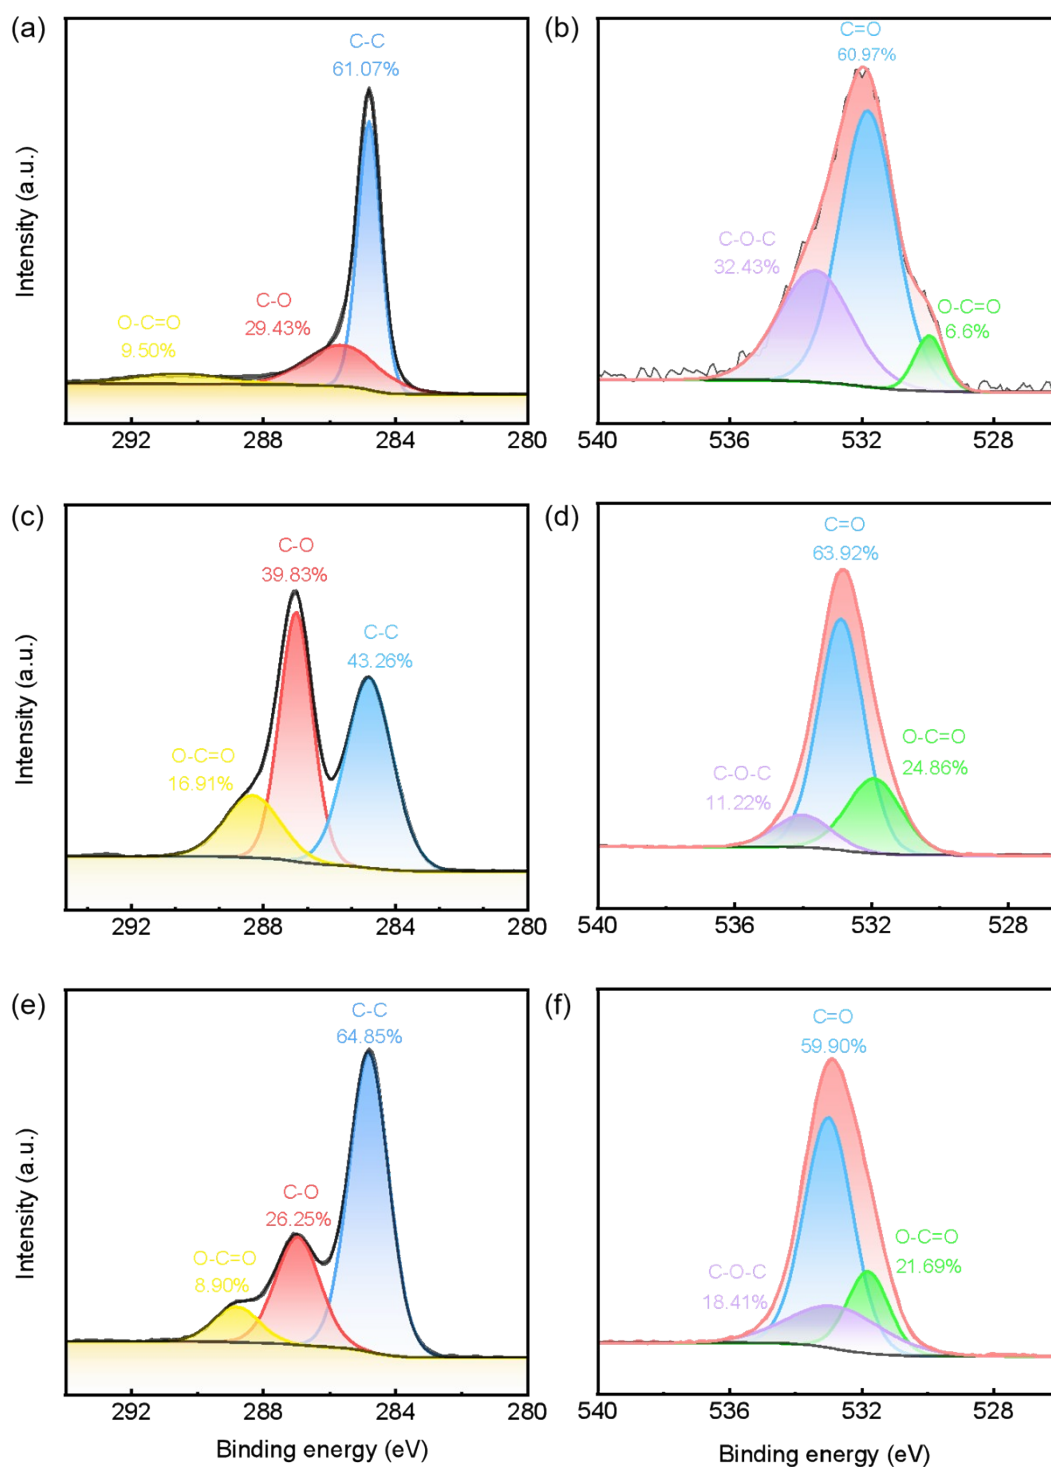

**Figure S2.** C 1s spectrum of (a) spent graphite, (c) graphite oxide, and (e) graphene oxide (GO); O 1s spectrum of (b) spent graphite, (d) graphite oxide, and (f) graphene oxide (GO).

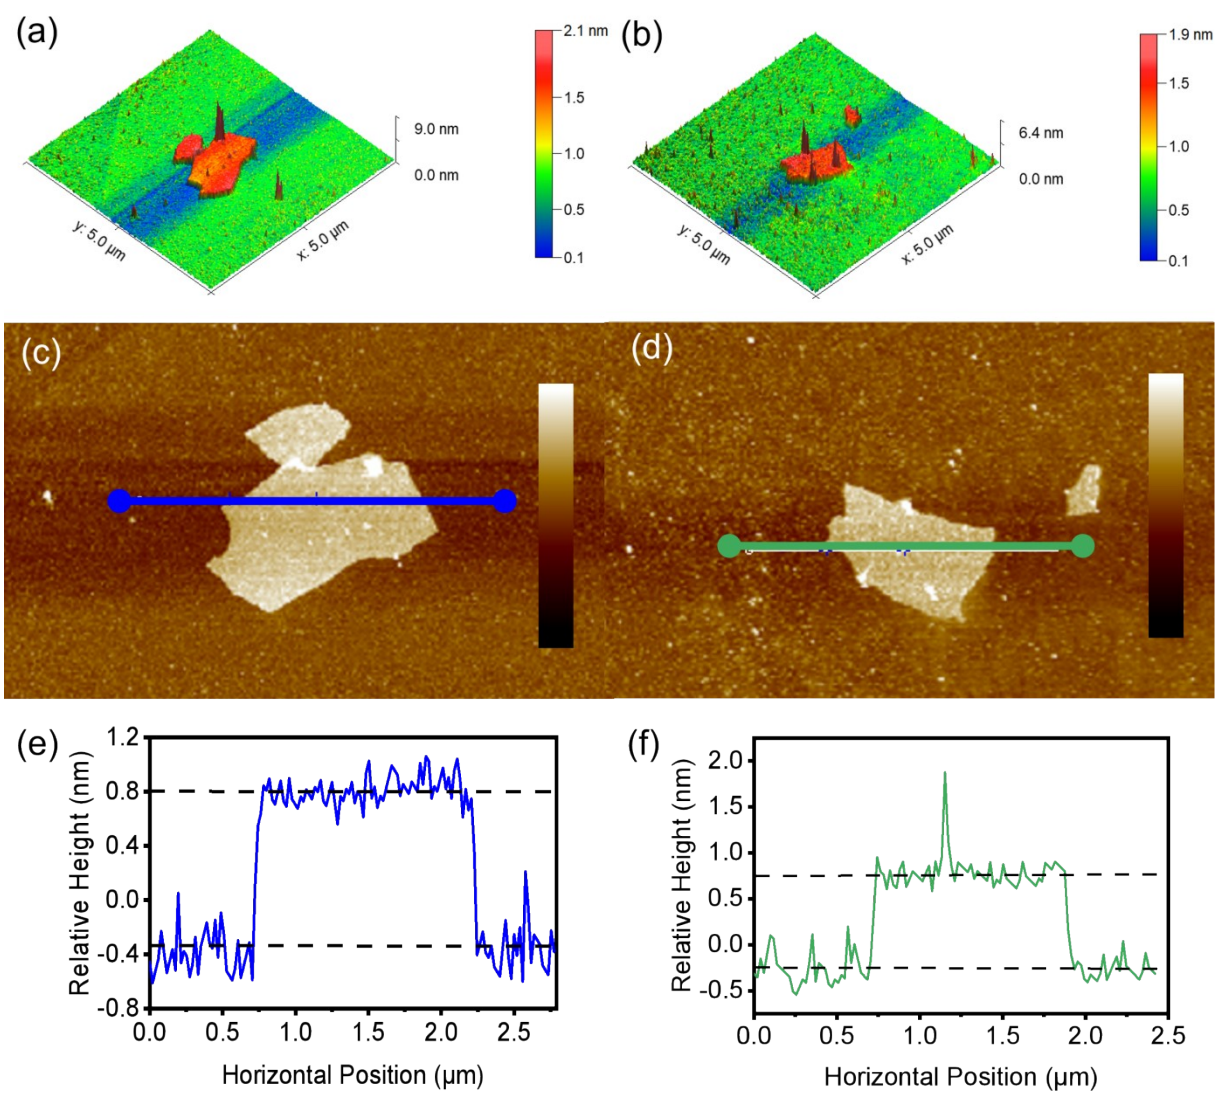

**Figure S3.** (a, b) AFM 3D image; (c, d) AFM surface image of graphene oxide (GO) nanosheet; (e, f) Size of graphene oxide (GO) nanosheet.

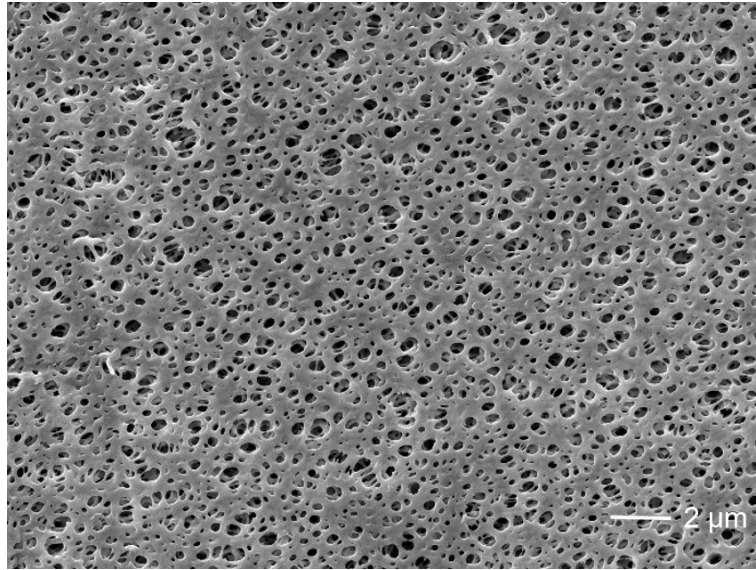

**Figure S4.** SEM images of the polyethersulfone (PES).

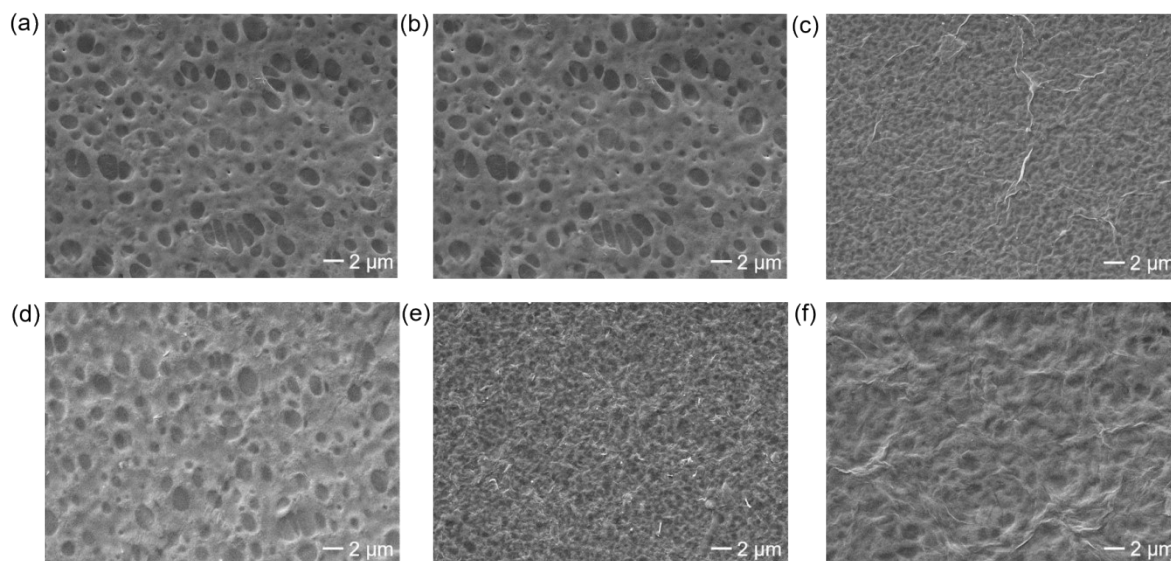

**Figure S5.** SEM images of the graphene oxide (GO) membrane (a, b, and c) and graphene oxide-polyethyleneimine (GO-PEI) membrane (d, e, and f) surface with the different graphene oxide (GO) deposition amounts: (a, d)  $0.15\text{g}\cdot\text{m}^{-2}$ ; (b, e)  $0.3\text{g}\cdot\text{m}^{-2}$ ; (c, f)  $0.6\text{g}\cdot\text{m}^{-2}$ .

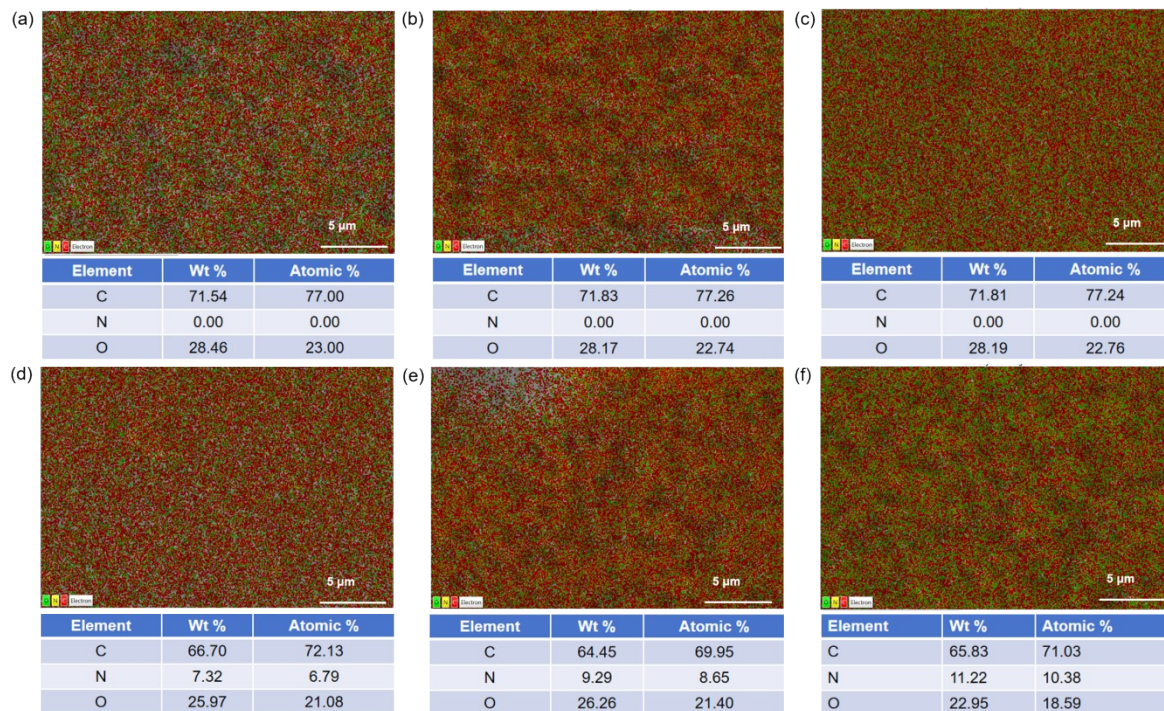

**Figure S6.** EDS of the graphene oxide (GO) membrane (a, b, and c) and graphene oxide-polyethyleneimine (GO-PEI) membrane (d, e, and f) surface with the different graphene oxide (GO) deposition amounts:: (a, d)  $0.15\text{g}\cdot\text{m}^{-2}$ ; (b, e)  $0.3\text{g}\cdot\text{m}^{-2}$ ; (c, f)  $0.6\text{g}\cdot\text{m}^{-2}$ .

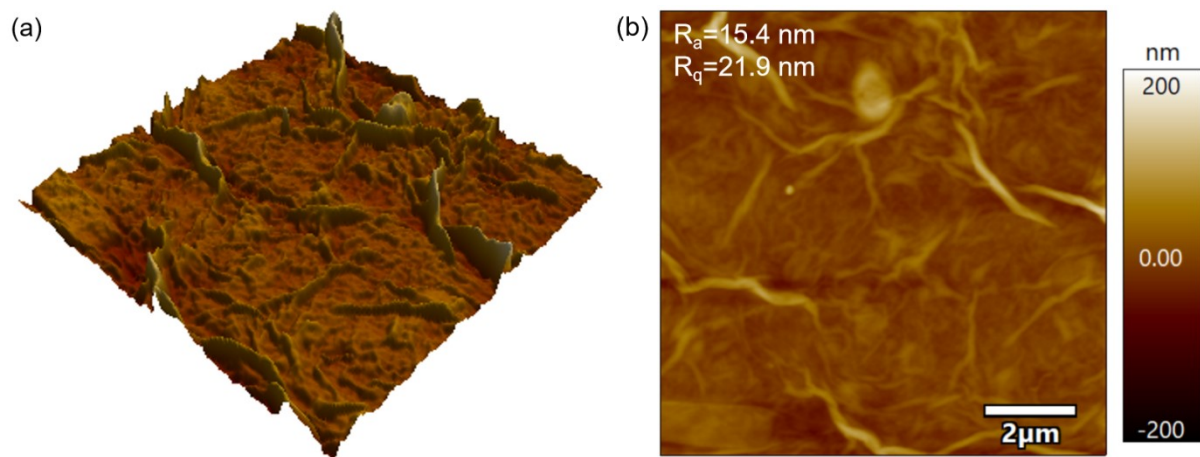

**Figure S7.** (a) AFM surface image, and (b) surface roughness of graphene oxide (GO)

(0.6) membrane.

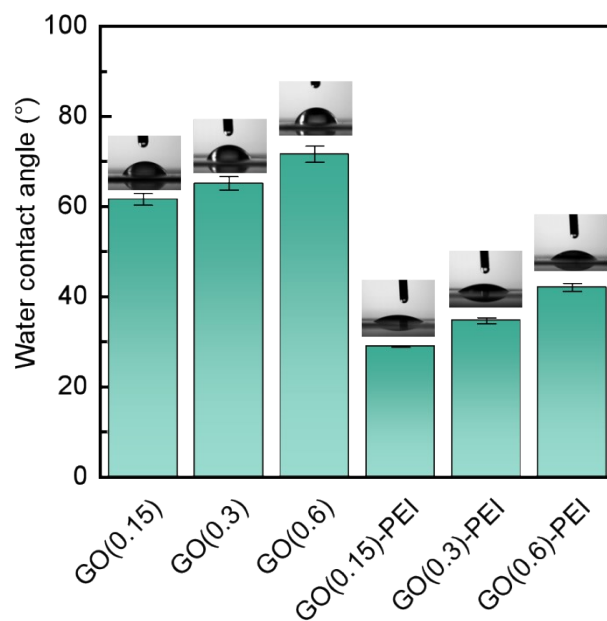

**Figure S8.** The contact angles for graphene oxide (GO) membranes and graphene oxide-polyethyleneimine (GO-PEI) membranes with the different loadings:0.15, 0.3, and 0.6

$\text{g}\cdot\text{m}^{-2}$ .

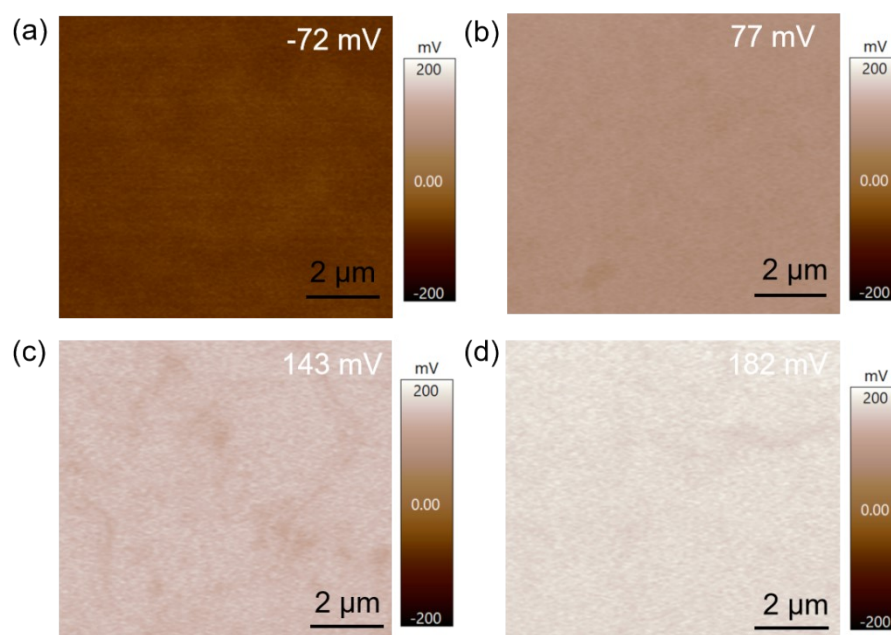

**Figure S9.** The potentials of (a) graphene oxide (GO) membrane, (b) GO (0.15)-polyethyleneimine (PEI) membrane, (c) GO (0.3)-PEI membrane, and (d) GO (0.6)-PEI membrane.

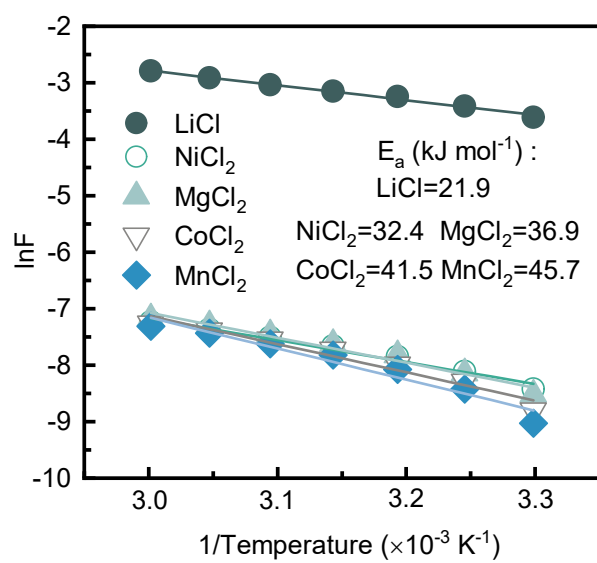

**Figure S10.** Activation energy for ion permeation through the GO(0.6)-PEI membrane.

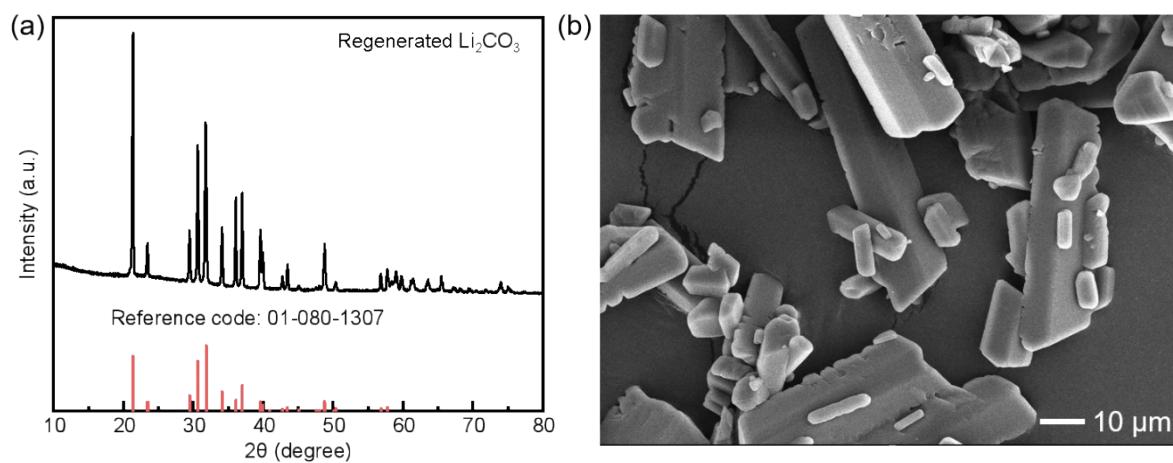

**Figure S11.** (a) XRD pattern, and (b) SEM image of the recovered  $\text{Li}_2\text{CO}_3$  product.

## References

- (1) F., Sheng, B., Wu, X., Li, T., Xu, M., Shehzad, X., Wang, L., Ge, H., Wang and T., Xu. *Adv. Mater.*, 2021, **33**, 44, 2104404.
- (2) S., Bing, W., Xian, S., Chen, Y., Song, L., Hou, X., Liu, S., Ma, Q., Sun and L., Zhang. *Matter*, 2021, **4**, 6, 2027-2038.
- (3) H., Wu, H., Zhao, Y., Lin, X., Liu, L., Wang, H., Yao, Y., Tang, L., Yu, H., Wang and X., Wang. *J. Membrane Sci.*, 2023, **672**, 121468.
- (4) Q., Wen, D., Yan, F., Liu, M., Wang, Y., Ling, P., Wang, P., Kluth, D., Schauries, C., Trautmann, P., Apel, W., Guo, G., Xiao, J., Liu, J., Xue and Y., Wang. *Adv. Funct. Mater.*, 2016, **26**, 32, 5796-5803.
- (5) S., Liang, S., Wang, L., Chen and H., Fang. *Sep. Purif. Technol.*, 2020, **241**, 116738.
- (6) Z., Zhou, D., Shinde, D., Guo, L., Cao, R., Nuaimi, Y., Zhang, L., Enakonda and Z., Lai. *Adv. Funct.*, 2021, **32**, 6, 2108672.
- (7) T., Foller and R., Joshi. *ACS Nano.*, 2021, **15**, 6, 9201-9203.
- (8) Y., Kang, T., Hu, Y., Wang, K., He, Z., Wang, Y., Hora, W., Zhao, R., Xu, Y., Chen, Z., Xie, H., Wang, Q., Gu and X., Zhang. *Nat. Commun.*, 2023, **14**, 4075.
- (9) Z., Zhou, K., Zhao, H-Y., Chi, Y., Shen, S., Song, K-J., Hsu, M., Chevalier, W., Shi and K., Agrawal. *Nat. Commun.*, 2024, **15**, 4006.
- (10) B., Niu, J., Xiao and Z., Xu. *J. Hazard. Mater.*, 2022, **439**, 129678.
- (11) Q., Li, Y., Liu, Y., Jia, Y., Ji, F., Yan, J., Li, Y., Mohammad and B., He. *J. Membrane Sci.*, 2023, **677**, 121634.

- (12) W., Li, C., Shi, A., Zhou, X., He, Y., Sun and J., Zhang. *Sep. Purif. Technol.*, 2017, **186**, 233-242.
- (13) J., Lu, C., Dai, S., Li, D., Zou, Y., Sun and W., Jing. *Sep. Purif. Technol.*, 2024, **338**, 126508.
- (14) F., Sheng, B., Wu, X., Li, T., Xu, M. A., Shehzad, X., Wang, L., Ge, H., Wang and T. Xu. *Adv. Mat.*, 2021, **33**, 2104404.
- (15) R., Tan, A., Wang, R., Malpass-Evans, R., Williams, E. W., Zhao, T., Liu, C., Ye, X., Zhou, B. P., Darwich, Z., Fan, L., Turcani, E., Jackson, L., Chen, S. Y., Chong, T., Li, K. E., Jelfs, A. I., Cooper, N. P., Brandon, C. P., Grey, N. B., McKeown and Q., Song. *Nat. Mater.*, 2020, **19**, 195-202.
